# Supplementary figures and images for: Application potential of biogenically synthesized silver nanoparticles usingLythrum salicariaL. extracts as pharmaceuticals and catalysts for organic pollutant degradation
Source: Royal Society of Chemistry journal article supplement (doi:10.1039/d1ra05570d), 2021-01-01

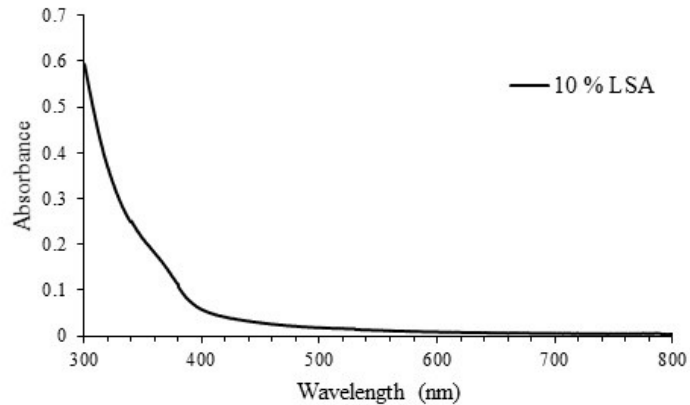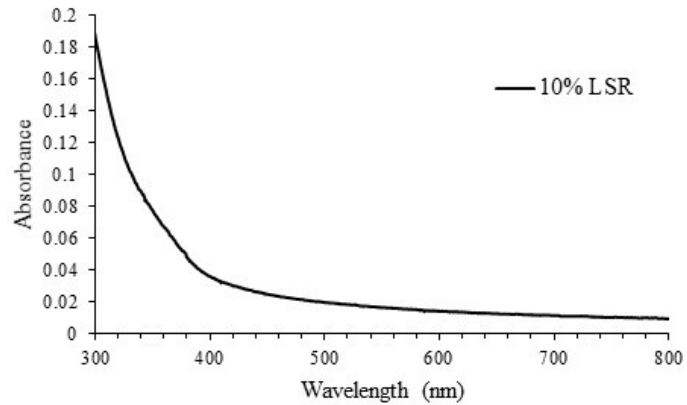

Supplement: d1ra05570d1.pdf [file d1ra05570d1.pdf]
